# Supplementary material for: Increased MCHC*RDW-SD interaction values: indicators of neurological impairment in lead-poisoned children
Source: PeerJ. 2024 Feb 28;12:e17017. doi: 10.7717/peerj.17017 (PMC10908253; doi:10.7717/peerj.17017)
Supplement: Supplemental Information 1 [file peerj-12-17017-s001.xlsx]

## Sheet: Sheet 1
gender	age	ast	tp	alb	glo	tb	db	ib	urea	crea	wbc	net	mon	bas	hb	rbc	hct	mcv	mch	mchc	rdw_cv	rdw_sd	plt	pcv	pdw	lead	neurological impairment	type of lead exposure	MCHC*RDW_SD
1	1	30	54.3	33.5	20.8	14.8	4.3	10.5	2.26	24.8	7.8	1.279	0.71	0.047	131	3.89	0.378	97.1	33.7	347	14.3	61.5	405	8.4	16.1	178	0	1	-4.08748
1	13		75.2	44.4	30.8	14.6			4.2	54	7.8	5.008	0.218	0.008	158	4.95	0.449	90.8	31.9	352	14	54.3	190	10.6	16.2	155	1	3	-2.89961
1	13		78.2	49.4	28.8	17.8			3.9	56	7.3	4.811	0.212	0.015	152	4.92	0.433	88	30.9	351	13.9	52.4	135	13.2	16.2	144	1	3	-2.11109
1	12	17	76.3	43.6	32.7	15	3.6	11.4	5.31	50.4	5.4	3.424	0.108	0.005	137	4.51	0.386	85.5	30.4	355	13.4	49.1	314	8.9	15.8	235	1	5	-1.49047
2	8	25	76.7	44.5	32.2	3.4	0.8	2.6	6.29	32.4	7.1	3.791	0.27	0.014	133	4.4	0.381	86.6	30.2	349	13.3	49.2	354	7.6	15.6	123	0	5	-0.83926
2	5	62	68	43.5	24.5	9.6			4.9	28	6.7	3.022	0.141	0.027	127	4.24	0.36	84.9	30	353	13.1	47.5	287	8.3	15.8	115	0	5	-0.707595
1	11	37	62.9	39.3	23.6	4.9	1.2	3.7	4.04	17.9	8.1	2.657	0.324	0.049	128	4.53	0.361	79.8	28.3	354	13.8	47.1	243	8.3	15.5	270	0	2	-0.660765
1	2	36	71.1	43.4	27.7	3.8	0.8	3	4.91	21.4	8.3	3.42	0.589	0.033	137	4.73	0.384	81.1	29	357	13.3	46.2	338	7.3	15.3	135	1	5	-0.585726
1	2	32	61.9	40.7	21.2	3.9	1.1	2.8	3.88	28.3	5	1.995	0.535	0.035	115	4.24	0.332	78.3	27.1	346	14.6	49	33	8.7	16.1	210	1	2	-0.44082
1	11		76	48.7	27.3	18.9			5	43	5.3	3.334	0.175	0.005	140	4.81	0.413	85.8	29.1	339	14.5	53	134	12.8	16.2	328	1	3	-0.43971
1	2	41	75.5	47.7	27.8	6.8	1.8	5	3.88	25.9	9.6	3.955	0.25	0.029	118	4.07	0.331	81.4	29	356	13.2	45.9	349	8.7	15.4	105	0	6	-0.389453
1	4	22	70.7	44.8	25.9	7	1.8	5.2	3.98	26.3	6.6	4.303	0.165	0.013	126	4.65	0.353	75.9	27.1	357	14.1	45.6	277	8.4	15.7	226	0	5	-0.351528
1	12	19	72	44.1	27.9	5.9	1.4	4.5	4.4	36.5	6.6	3.729	0.277	0.007	142	5	0.415	83.1	28.4	342	14.2	50.5	202	9.2	15.9	113	0	5	-0.334095
1	8	31	79	47.2	31.8	7.1	1.6	5.5	4.9	33.6	5.2	2.668	0.203	0.01	130	4.57	0.374	81.8	28.4	348	13.7	47.8	263	8.7	16	224	0	5	-0.313692
1	2	33	70.9	45.6	25.3	3	0.9	2.1	3.47	22.8	6.8	4.291	0.177	0.014	116	4.06	0.325	80	28.6	357	13.3	45.5	358	7.6	15.3	283	1	2	-0.312495
1	2	44	75.5	48	27.5	5.9	1.5	4.4	3.62	23.6	11.6	4.756	0.336	0.046	130	4.6	0.376	81.7	28.3	346	13.9	48.5	435	8.1	15.3	183	0	6	-0.304835
2	1	40	69	43.8	25.2	5			2.9	22	6.7	2.09	0.308	0.047	119	4.69	0.359	76.5	25.4	332	18.6	60.8	341	7.8	15.4	278	1	2	-0.297094
1	3	22	69.7	46.7	23	8.1	1.7	6.4	6.29	23.1	5.8	2.123	0.162	0.023	135	4.8	0.38	79.1	28.1	356	13.5	45.6	304	8.3	15.7	259	1	3	-0.275582
1	1	40	67	43.6	23.4	3.9	0.9	3	3.91	17.5	12	2.82	0.312	0.024	142	5.08	0.404	79.6	28	351	13.8	46.7	314	8.2	15.8	140	1	2	-0.254199
1	6		67.3	42.7		8.2			2.9	32	9.9	6.168	0.267	0.02	133	4.76	0.378	79.5	27.9	351	13.7	46.6	346	7.8	15.3	230	1	5	-0.221622
1	8	22	71.4	45.4	26	6.3	1.6	4.7	4.95	34.6	8.8	3.854	0.343	0.044	131	4.52	0.375	82.9	29	350	13.1	46.8	267	8.1	15.9	160	0	5	-0.197918
1	10	24	73.2	44.2	29	6.7	1.4	5.3	3.6	46.6	6.6	3.234	0.132	0.013	136	4.5	0.394	87.6	30.2	345	13.6	48.5	349	7.7	15.6	176	1	6	-0.197685
1	1	44	71.6	45.5	26.1	6.2	1.4	4.8	3.59	15.3	12.8	4.058	0.806	0.077	123	4.62	0.356	77	26.6	346	14.6	48.1	440	8.2	15.3	182	1	5	-0.196047
1	1	33	64.7	44.6	20.1	4.6	1.3	3.3	4.98	24.3	13.1	3.314	0.865	0.079	110	4.28	0.325	76	25.7	338	16.1	52.5	311	8	15.5	300	0	3	-0.191195
1	5		74.8	42.6		17.1			4.7	28	9.1	4.559	0.291	0.018	129	4.4	0.367	83.5	29.3	351	13	46.5	361	7.8	15.3	112	0	5	-0.189045
1	8	33	68.9	42.7	26.2	4.9	1.3	3.6	3.92	31.6	9.2	6.293	0.478	0.009	127	4.58	0.361	78.9	27.7	351	13.7	46.4	189	11.9	15.9	116	0	5	-0.156468
1	12	25	67.2	43.2	24	8.6	2	6.6	5.14	36.7	6.7	3.236	0.342	0.013	122	4.18	0.354	84.6	29.2	345	13.3	48.3	251	8.9	16.1	354	0	3	-0.145443
1	7	30	80.7	47.7	33	6.9	1.6	5.3	6.33	34.9	7.7	4.289	0.193	0.023	130	4.39	0.381	86.8	29.6	341	13.5	50.2	290	8.9	15.9	259	0	5	-0.139974
2	7	26	68.3	43.3	25	12.9	3	9.9	5.07	34.6	6.9	2.498	0.186	0.021	134	4.68	0.395	84.4	28.6	339	14.2	51.4	212	8.7	15.8	122	0	5	-0.12507
1	1	39	67.3	43.1	24.2	12.2			3.2	18	6.6	2.878	0.356	0.033	129	4.54	0.378	83.3	28.4	341	14	50	437	7.7	15.3	217	1	5	-0.09634
2	2	40	65.7	44.2	21.5	7.7	1.8	5.9	5.47	25.5	7.3	3.168	0.161	0.029	132	4.78	0.376	78.7	27.6	351	13.7	46.1	366	8.6	15.7	172	1	5	-0.058737
1	8	24	67	43.6	23.4	12.1	2.6	9.5	4.21	30.9	5.8	2.616	0.267	0.023	131	4.48	0.376	84	29.2	348	13	46.8	233	8.2	16.1	350	1	5	-0.020202
1	4	33	68	44.6	23.4	9.6	1.9	7.7	4.35	29.6	7.6	3.177	0.395	0.038	120	4.23	0.341	80.6	28.4	352	13.3	45.7	388	7.8	15.5	204	1	3	-0.005451
1	10	24	71	44.6	26.4	7.8	1.8	6	5.07	36.2	9.1	5.633	0.182	0.018	134	4.5	0.385	85.5	29.8	348	13	46.6	312	7.3	15.6	120	1	6	0.038496
1	11		72.7	45.2	26.5	12.4			5.4	52	5.6	2.766	0.14	0	137	4.72	0.405	85.8	29	338	13.9	50.9	158	10.5	16.3	225	1	5	0.106229
1	7	56	75.3	48.7	26.6	9.8	3.8	6	5.03	25.7	5.9	2.708	0.46	0.024	132	4.66	0.385	82.7	28.3	343	13.7	48.1	255	8.2	15.7	111	1	5	0.112491
2	2	30	71.8	45.9	25.9	4.8	1.3	3.5	4.35	22.2	11.3	5.842	0.441	0.057	130	4.64	0.38	82	28	342	13.8	48.5	438	8.4	15.5	129	0	2	0.123765
1	1	46	70.5	43.8	26.7	3.9	1.6	2.3	5.48	12.3	11.1	4.762	0.255	0.056	127	4.74	0.365	77.1	26.8	348	14.1	46.2	389	9.1	15.4	214	0	2	0.155892
1	1	34	65.6	43.4	22.2	4.3	1	3.3	4.12	17.4	5.6	1.859	0.61	0.028	126	4.51	0.368	81.5	27.9	343	13.7	47.9	420	7.8	15.7	113	1	5	0.160429
1	4	41	63.9	41.2	22.7	6.6	1.7	4.9	3.47	32.2	7	2.576	0.238	0.028	117	4.16	0.344	82.8	28.1	340	13.9	49.3	203	8.9	16.1	250	0	5	0.172137
2	6	68	63.1	45.5	17.6	3.5	0.7	2.8	3.81	20.8	12.4	2.827	0.273	0.037	125	4.59	0.351	76.4	27.2	356	13.6	44.4	506	7.5	15.5	119	0	6	0.179902
1	7	37	71.2	44.9	26.3	7.8	1.8	6	3.35	38.2	7	3.703	0.175	0.014	134	4.51	0.381	84.4	29.7	352	12.5	45.1	393	7.9	15.4	265	0	5	0.196467
2	5	28	67.3	42.6	24.7	10.5	2.8	7.7	3.02	32.9	7.9	3.46	0.284	0.016	129	4.43	0.384	86.6	29.1	336	14	51.9	318	7.4	15.8	214	0	5	0.207807
1	6	33	74.6	43.4	31.2	5.3	1.1	4.2	7.22	35.7	10.7	8.004	0.342	0.021	118	4.25	0.343	80.7	27.8	344	13.7	47.3	269	8.7	15.7	154	0	5	0.210005
2	5	66	64.6	46.5	18.1	4.4	1.1	3.3	4.1	20.8	14.6	2.526	0.248	0.044	132	4.8	0.381	79.4	27.5	346	13.8	46.6	521	8.3	15.9	131	0	6	0.211908
1	5	64	74.9	43.1	31.8	10.5			3.6	23	9.2	5.364	0.442	0.018	134	4.59	0.376	82	29.2	356	12.6	44.3	389	8.1	15.4	142	0	5	0.217859
1	6		78.1	42.6	35.5	11.1			3.02	29	9.6	5.386	0.394	0.048	134	4.58	0.393	85.9	29.3	341	12.9	48.5	418	8.4	15.4	150	0	4	0.230915
1	6	35	61.1	40.2	20.9	6.3	1.9	4.4	3.89	25.4	3.8	1.49	0.228	0.011	124	4.38	0.358	81.8	28.3	346	13.3	46.5	195	10.3	15.8	259	1	3	0.239105
1	12	30	73.6	45.4	28.2	7.6	2.1	5.5	4.33	41.8	3.7	1.854	0.141	0.007	144	5.01	0.422	84.2	28.7	341	13.5	48.3	302	9.5	15.9	115	0	5	0.274549
1	3	36	68.5	41.6	26.9	10.1			4.3	25	7.6	2.386	0.289	0.023	113	4.07	0.329	80.8	27.8	344	12.9	46.9	290	8.1	15.5	158	1	5	0.310185
1	13	20	84.2	50.5	33.7	13.5	3.7	9.8	5.26	34	7.2	3.427	0.194	0.022	154	5.07	0.451	89	30.4	341	12.9	48.1	306	9.6	16.2	124	1	1	0.318183
1	10	28	75.5	42.5	33	6.4			3.4	42	8.3	4.856	0.232	0.033	132	4.59	0.38	82.8	28.8	347	12.3	45.9	327	8.8	16	190	0	5	0.323113
1	8	32	71.8	41.2	30.6	6.7			3.6	25	6.8	3.72	0.17	0.014	124	4.46	0.362	81.1	27.8	343	13.2	47.2	262	8.3	15.6	257	1	4	0.328212
1	1	36	70.4	44.1	26.3	11.3	2.3	9	5.04	24.7	9.6	2.851	0.278	0.029	118	4.31	0.339	78.7	27.4	348	13.5	45.6	390	8.9	15.8	155	0	2	0.331986
2	3	30	63.3	42.5	20.8	8.7	2.3	6.4	4.5	26.6	6.8	3.869	0.218	0.014	121	4.27	0.346	81.1	28.3	349	13	45.2	280	7.9	15.5	135	1	3	0.37774
2	6	22	73.6	45.9	27.7	6.4	1.4	5	4.62	31.8	7.3	4.015	0.197	0.015	128	4.42	0.362	82	29	353	12.6	44.3	282	9.2	15.5	125	0	5	0.403733
1	3	40	68.7	46.7	22	15.2	3	12.2	5.22	29.5	7.7	3.126	0.254	0.015	130	5.05	0.374	74.1	25.7	347	14.4	45.6	293	9	15.6	232	1	5	0.407932
1	5	26	71.4	43.7	27.7	4.5	1.1	3.4	3.07	27.6	8.9	6.088	0.329	0.027	120	4.46	0.353	79.1	26.9	340	14.2	48.1	292	9.3	15.8	215	0	5	0.421029
2	1	35	70	45.7	24.3	4.4	0.8	3.6	3.38	20.8	11.7	4.025	0.316	0.035	127	4.59	0.371	80.8	27.7	342	13.6	47.2	465	7.7	15.6	110	1	2	0.421374
1	13	15	75	48.2	26.8	14	3.5	10.5	3.04	46.7	8.9	6.177	0.267	0.018	163	5.69	0.489	85.9	28.6	333	14.6	53.4	247	9.9	16	100	1	5	0.440874
1	8	31	76.3	45.4	30.9	5.7	1.6	4.1	5.24	30.5	9.2	4.241	0.248	0.028	133	5.05	0.389	77.1	26.3	342	14.3	47.1	300	8.8	15.8	141	0	5	0.444267
1	3	44	71.8	46.3	25.5	12.9	2.6	10.3	4.18	30.8	7	2.695	0.133	0.028	126	4.83	0.352	72.9	26.1	358	13.9	43.4	355	9.4	15.8	110	0	5	0.454924
2	1	65	68	42.5	25.5	1.6	0.6	1	5.18	21.2	11.8	7.729	0.295	0.035	119	4.36	0.341	78.2	27.3	349	13.4	44.9	640	7.9	15.8	210	1	5	0.469015
2	2	67	69.3	39.6	29.7	2			2.8	18	6.8	2.924	0.265	0.014	124	4.44	0.367	82.7	27.9	338	13.8	48.8	418	8.2	15.5	365	0	2	0.496598
1	2	33	70.5	46.4	24.1	12.3	2.9	9.4	3.39	26.7	7.3	2.19	0.204	0.022	129	4.89	0.366	74.9	26.4	352	13.8	44.2	278	9	15.6	190	1	5	0.499344
2	4	40	71.7	42.4	29.3	7.2	2	5.2	6.37	28.8	7.8	3.627	0.226	0.023	114	4.04	0.336	83.2	28.2	339	13.5	48.2	324	8.9	15.9	163	0	5	0.50421
1	2	38	73.1	44.9	28.2	3.7	0.7	3	5.77	18.2	13.2	5.188	0.317	0.04	129	4.95	0.375	75.7	26.1	344	14.3	46.1	372	8.4	15.5	104	1	2	0.510545
1	3	26	62.3	41.7	20.6	3.2	0.9	2.3	4.77	29.8	6.2	2.12	0.143	0.012	125	4.53	0.366	80.7	27.6	342	13.6	46.8	282	7.9	15.6	156	0	5	0.512946
1	13	38	78.5	47.5	31	10.5	3	7.5	5	51.9	5.5	3.262	0.127	0.006	151	5.12	0.447	87.3	29.5	338	13.3	48.7	216	11.3	16	228	1	3	0.515187
1	10	24	74.6	45.8	28.8	3.1	0.8	2.3	4.95	45.4	6.1	3.398	0.244	0.031	141	5.37	0.403	75.1	26.3	350	13.9	44.4	391	8.4	15.6	178	0	5	0.558106
1	9	26	69.7	42.1	27.6	12.3	2.7	9.6	5.36	34.7	4.8	2.357	0.274	0.024	127	4.72	0.364	77.2	26.9	349	13.1	44.6	240	9.5	15.7	167	1	1	0.56029
1	3	39	63.8	42.9	20.9	5.9	1.4	4.5	6.16	26.5	8.8	4.11	0.264	0.035	127	4.5	0.376	83.6	28.2	338	13.5	48.4	357	9.2	15.5	118	1	1	0.570954
2	1	50	68.8	46.5	22.3	4	0.8	3.2	4.18	22.6	7.2	3.737	0.302	0.014	121	4.58	0.358	78.2	26.4	338	14.4	48.2	251	10.8	15.8	108	1	1	0.608132
1	1		75.8	48.9	26.9	4.9			3.7	22	12.6	3.276	1.008	0.038	127	5.22	0.375	71.9	24.3	338	15.7	48.2	339	7.6	15.4	170	0	2	0.608132
1	1	41	65.7	47.8	17.9	5.2	1.3	3.9	5.5	26.5	13.6	3.346	0.354	0.041	130	4.93	0.374	75.8	26.4	348	13.8	44.6	461	7.9	15.3	207	1	5	0.625476
1	2	18	71.6	44.5	27.1	17	4.7	12.3	4.22	41.5	13.2	4.501	0.449	0.053	124	4.43	0.359	81.1	28	345	13.3	45.3	425	7.7	15.2	226	1	2	0.638187
2	1		74.1	47.7	26.4	4.6			3.55	33	9.6	2.803	0.394	0.038	129	4.98	0.376	75.6	25.9	343	14.2	45.9	182	11.7	16	143	1	5	0.639809
1	9	23	73.4	45.4	28	2	1	1	5.58	30.2	7.7	3.219	0.223	0.031	140	5	0.413	82.7	28	339	13.7	47.5	235	10.3	16	127	1	5	0.641865
1	11	21	74	45	29	4.4	1.3	3.1	3.35	31.8	5.6	3.707	0.386	0.028	140	5.25	0.401	76.3	26.7	349	13.6	44.3	317	8.4	15.7	166	1	5	0.651565
2	10	47	69.1	41.4	27.7	4.4			5.9	20	8.4	2.747	0.454	0.05	112	4.62	0.334	72.2	24.2	336	15.8	48.9	301	9	15.2	130	1	5	0.700917
1	8	22	69.9	41.4	28.5	6.4	1.3	5.1	5.15	34.1	8.2	4.33	0.336	0.008	126	4.41	0.368	83.4	28.6	343	12.8	45.6	327	7.9	15.5	389	1	3	0.711716
2	1	49	77.2	48.4	28.8	4.5			5.5	19	9	5.148	0.279	0.018	129	5.01	0.382	76.3	25.7	337	14.8	48.2	228	11.1	15.7	125	1	5	0.712054
1	1	37	69.6	46	23.6	10.9	2.5	8.4	4.79	19.2	9.4	3.657	0.244	0.028	118	4.44	0.34	76.5	26.6	347	13.6	44.5	329	7.7	15.4	150	0	2	0.718935
1	2	28	60.6	40.5	20.1	5.4	1.3	4.1	6.25	18	7.3	3.365	0.241	0.029	130	4.88	0.386	79.1	26.6	337	14.1	47.9	394	7.7	15.5	252	0	3	0.764593
1	5	40	69.9	43.6	26.3	3	0.8	2.2	7.17	24.8	10.4	5.751	0.218	0.01	126	4.64	0.36	77.6	27.2	350	13.4	43.7	371	8.2	15.6	121	1	3	0.778613
2	7	46	74.3	43.1	31.2	10.3			5.1	19	11.2	3.965	0.381	0.056	129	4.8	0.376	78.3	26.9	343	13.5	45.3	359	8.4	15.5	256	0	4	0.783623
2	1	64	74.3	44.3	30	4.2			4.9	19	15	7.635	1.08	0.03	132	4.94	0.385	77.9	26.7	343	13.6	45.3	381	7.7	15.4	112	0	5	0.783623
1	2	26	58.8	39.9	18.9	6.9	2	4.9	3.02	19.8	7.1	3.245	0.27	0.028	118	4.27	0.347	81.2	27.6	340	13	46.3	181	8.3	15.9	152	1	2	0.794367
1	1	59	69.3	42.3	27	7.5			4.05	29	7.6	1.801	0.236	0.03	118	4.15	0.333	80.2	28.4	355	13.6	42.9	378	7.5	15.4	172	1	5	0.796151
1	1	45	71.1	45.1	26	3.6	0.9	2.7	4.87	20.7	11.7	4.715	0.281	0.035	120	4.58	0.356	77.8	26.2	337	14.3	47.7	366	9.7	15.8	214	1	6	0.799619
1	2	39	67.7	46.8	20.9	4.6	1.1	3.5	4.93	20.1	14.6	4.76	0.496	0.044	130	4.81	0.379	78.8	27	343	13.4	45.2	434	7.7	15.6	132	0	5	0.807592
1	3	30	66.1	43.6	22.5	9.9	2.6	7.3	3.72	26.9	6.6	2.218	0.244	0.026	122	4.74	0.346	72.9	25.7	353	13.8	43.1	327	8.5	15.8	115	1	5	0.820481
2	1	38	66.2	44.9	21.3	3.5	1	2.5	4.72	21.4	8.7	2.697	0.2	0.035	120	4.57	0.353	77.2	26.3	340	13.9	46	417	7.6	15.5	135	0	5	0.85659
1	2	34	67.8	46.8	21	5.8	1.7	4.1	3.97	18.5	15.3	6.044	0.383	0.031	138	5.34	0.406	76.1	25.8	340	14.2	45.9	404	9	15.4	308	0	5	0.877331
1	3	24	63.3	43.5	19.8	5.7	1.4	4.3	4.59	23.2	7.9	5.285	0.213	0.024	112	4.08	0.333	81.5	27.5	337	13.5	47.2	341	8.2	15.5	220	0	5	0.887184
1	1	33	71.9	47.2	24.7	6.1	1.5	4.6	5.85	24.8	12.8	3.302	0.333	0.026	128	5.2	0.381	73.3	24.6	336	15.3	47.7	411	8.4	15.5	175	1	2	0.898161
1	4	25	72.1	46.2	25.9	5.8	1	4.8	4.73	25.8	6.8	3.733	0.306	0.027	130	4.93	0.385	78	26.4	338	14	46.5	357	7.9	15.7	126	0	5	0.924145
1	2	58	77.6	49.3	28.3	6.9	1.4	5.5	3.64	25.6	12.8	5.158	0.435	0.038	120	4.32	0.351	81.2	27.8	342	13.2	45	374	7.9	15.4	200	1	6	0.92502
2	7		76.2	44.6		7.4			5.8	25	12.9	5.121	0.284	0.052	125	4.74	0.373	78.7	26.4	335	14.3	48.1	345	7.8	15.6	161	1	4	0.935259
2	2	37	67.6	44.5	23.1	9.6	2.6	7	2.03	19.2	9.2	2.631	0.285	0.037	133	4.57	0.398	87.1	29.1	334	14.1	48.7	484	7.5	15.5	151	1	1	0.952395
1	3	32	66.5	43.9	22.6	3.8	0.8	3	3.39	30.2	5.3	2.173	0.196	0.027	127	4.64	0.368	79.4	27.4	345	12.6	44	240	9	15.9	129	1	3	0.97776
1	1	39	63.4	43.6	19.8	3.6	1.6	2	4.28	19.6	9.1	3.03	0.3	0.027	119	4.49	0.341	76	26.5	349	13.2	43.2	418	8	15.4	110	0	5	0.98624
1	1	30	65.6	44.9	20.7	4.8	1.6	3.2	3.96	25.3	10.7	3.114	0.492	0.043	122	4.88	0.364	74.5	25	336	14.8	47.1	552	7.2	15.6	116	0	3	0.996783
1	8	36	70.9	42.5	28.4	7.6	1.3	6.3	5.9	38.5	5.2	2.605	0.203	0.031	124	4.36	0.367	84.2	28.4	338	13	46.1	202	10.8	16.2	103	1	2	0.998501
1	9	32	72.9	47.6	25.3	9.3	2.5	6.8	3.28	33.7	5.9	2.903	0.271	0.024	132	4.64	0.402	86.6	28.4	329	15.4	54.3	254	11.5	16.1	139	1	3	1.00023
1	9	24	67.5	41.2	26.3	6.1	1.6	4.5	4.81	27.9	6.2	3.776	0.161	0.019	128	4.81	0.38	79	26.6	337	13.8	46.5	309	8.8	15.8	126	1	1	1.00977
2	1	36	72	46.3	25.7	3.3	0.8	2.5	3.72	23.5	12.6	4.813	0.58	0.038	129	5.03	0.382	75.9	25.6	338	14.1	46	367	8.1	15.5	123	0	5	1.01709
1	4	28	66.2	43.5	22.7	5.5	1.5	4	3.69	22.8	10.3	3.512	0.381	0.021	124	4.69	0.368	78.5	26.4	337	13.8	46.3	588	7.3	15.4	330	1	4	1.0448
1	4	29	67	44.7	22.3	7.1	1.8	5.3	3.27	25.5	9.5	3.088	0.323	0.029	121	4.51	0.36	79.8	26.8	336	13.7	46.8	341	7.9	15.4	237	0	4	1.04609
1	7	33	70.3	46.1	24.2	12.9	2.6	10.3	4.11	29.5	5.2	2.548	0.395	0.031	125	4.67	0.373	79.9	26.8	335	13.8	47.3	266	10.2	16.3	302	1	5	1.05815
2	4	26	71.3	44.1	27.2	7	1.4	5.6	3.52	25.7	8.4	2.596	0.218	0.025	136	4.77	0.408	85.6	28.5	333	14.3	48.7	578	7.3	15.4	141	1	1	1.0617
1	9	25	68.5	40.3	28.2	7.4	1.6	5.8	4.01	26.7	5.8	3.08	0.249	0.017	123	4.62	0.365	78.9	26.6	337	13.7	46.2	326	8.8	15.7	140	1	1	1.06231
1	5	28	70.6	43.9	26.7	6.3	1.6	4.7	2.77	35.8	9.6	5.126	0.25	0.019	114	3.83	0.327	85.4	29.8	349	12.6	42.9	317	9.2	16.1	349	1	1	1.07752
1	12	18	71.6	44.5	27.1	17	4.7	12.3	4.22	41.5	4.6	2.765	0.092	0.009	130	4.42	0.389	87.9	29.4	335	12.7	47	264	9.4	15.9	230	1	5	1.10423
1	1	52	67.5	42.8	24.7	5.1	1.4	3.7	5.02	18.7	14.2	4.345	0.327	0.043	119	4.55	0.359	78.8	26.2	332	14.6	49.2	338	8.5	15.6	135	1	6	1.11033
1	4	26	71.7	44.5	27.2	5.4	1.4	4	3.95	32.3	6.8	3.332	0.299	0.041	125	4.44	0.361	81.2	28.2	347	12	43.1	381	9	15.7	100	1	6	1.11476
1	1	80	67	38.3	28.7	2.9			4.4	28	10.2	4.468	0.836	0.031	117	5.23	0.358	68.4	22.4	327	19.8	57.6	326	8.6	15.4	140	1	5	1.11649
1	9	26	70.9	44.8	26.1	6.4	1.6	4.8	5.06	33.6	5.8	3.068	0.191	0.012	136	5.1	0.399	78.2	26.7	341	13.4	44.4	282	8.1	15.5	220	1	1	1.12541
1	10	27	67.2	39.4	27.8	7.4			3.28	52	5.6	3.136	0.302	0.017	133	4.72	0.402	85.2	28.2	331	13.4	50.1	231	9.8	15.9	220	1	4	1.1255
1	6	37	71.3	44.1	27.2	8.4	1.6	6.8	5.23	33.7	5.9	2.661	0.1	0.024	124	4.47	0.365	81.6	27.7	340	12.5	44.7	313	8.9	16	139	1	3	1.12622
1	1	32	71.6	49.2	22.4	6.1	1.5	4.6	4.84	19.5	12.1	5.155	0.605	0.036	124	4.83	0.376	77.9	25.7	330	15.4	51.2	364	7.4	15.6	185	1	3	1.14008
2	4	27	64.2	43.6	20.6	5.4	1.4	4	4.64	24.3	7.3	3.533	0.19	0.015	122	4.52	0.364	80.5	27	335	13.5	46.5	351	7.5	15.4	425	0	5	1.18104
1	1	40	66.6	42.7	23.9	3.5	0.8	2.7	2.45	25.4	9.6	2.957	0.365	0.029	118	4.61	0.352	76.4	25.6	335	14.2	46.4	401	8.2	15.3	105	1	2	1.1964
1	2	38	69	44.6	24.4	2.8	1.3	1.5	3.52	22	9.2	2.659	0.23	0.037	115	4.07	0.343	84.3	28.3	335	13.1	46.4	316	8.1	15.3	228	1	6	1.1964
1	2	54	71.7	42.9	28.8	5.8			6.4	28	14.1	6.317	0.55	0.042	125	4.69	0.369	78.7	26.7	339	13.2	44.6	327	8.1	15.5	202	1	2	1.21215
2	11	65	66.7	44.6	22.1	3.8	0.6	3.2	2.91	17.6	10.7	2.258	0.278	0.011	126	4.77	0.363	76.1	26.4	347	14.2	42.7	246	8.4	15.4	159	1	3	1.22785
2	1	117	66.7	44.9	21.8	1.8	0.9	0.9	4.73	20.8	9.1	2.421	0.319	0.027	124	4.95	0.375	75.8	25.1	330	15.5	50.3	429	8.9	15.6	140	0	5	1.22991
1	11	32	71.9	45.3	26.6	5.8	1.5	4.3	4.74	45.6	4.6	2.424	0.152	0.005	131	4.6	0.397	86.3	28.5	330	13.9	50.3	187	11.7	15.9	275	1	3	1.22991
1	9	25	77.2	46.3	30.9	9.3	2	7.3	5.07	33.3	9.7	6.499	0.495	0.01	124	4.65	0.379	81.4	26.7	328	15.6	53.4	255	8.6	15.9	194	1	6	1.24024
1	1	31	69.2	47	22.2	2	0.5	1.5	5.15	20.7	13.8	3.643	0.455	0.055	128	5.16	0.385	74.6	24.8	333	14.9	47.3	469	7.9	15.3	150	1	2	1.24662
1	2	37	61.8	43.3	18.5	3.8	1	2.8	4.99	22.5	6.9	2.96	0.407	0.028	122	4.55	0.359	78.8	26.8	340	13.1	44.1	293	8.6	15.9	170	0	5	1.25067
1	2	38	71.4	48.3	23.1	3.8	0.8	3	4.79	29.2	8.3	3.079	0.216	0.017	123	4.73	0.37	78.3	26	332	14.3	47.9	327	9.4	15.7	130	1	3	1.26806
1	6	78	71.6	48.5	23.1	8.2	2.2	6	1.6	19.8	26.1	8.143	0.757	0.078	120	4.87	0.361	74.2	24.6	332	15	47.8	520	10.1	15.8	129	1	5	1.2802
1	5	34	77.4	46.2	31.2	5.4	0.7	4.7	3.52	28.4	7.7	2.687	0.185	0.031	126	4.87	0.369	75.7	25.9	342	13	43.4	235	10.8	15.7	125	1	6	1.29131
1	11		70.3	41.1	29.2	12.2			5.9	46	4.2	2.73	0.214	0.008	135	4.8	0.409	85.3	28.1	330	13.9	49.6	141	10.8	16.5	106	1	5	1.29977
1	2	48	71.5	45.9	25.6	6.8	1.4	5.4	4.98	23.7	14.3	7.465	0.429	0.043	123	4.72	0.365	77.3	26.1	337	13.6	44.8	338	7.3	15.4	101	0	5	1.3075
1	4	26	71.8	45.2	26.6	4.6	1.1	3.5	3.38	41.6	10.1	3.969	0.434	0.02	123	4.63	0.366	79.1	26.6	336	13.4	45.1	371	7.2	15.2	177	1	4	1.32552
2	1	35	68.9	45.6	23.3	3.3	0.8	2.5	4	28.1	12.2	7.259	0.439	0.037	128	5	0.381	76.2	25.6	336	13.8	45	322	8.5	15.7	149	1	5	1.34196
1	9	25	67.7	44	23.7	5.6	1.4	4.2	3.84	33.4	4.7	1.955	0.122	0.009	128	4.71	0.375	79.7	27.2	341	13	43.4	266	7.9	15.8	198	1	1	1.34358
1	3	33	69.6	45.6	24	6.3	1.3	5	6.44	26.1	10.9	4.545	0.305	0.033	128	4.58	0.386	84.3	27.9	332	13.3	47	378	9.2	16	186	1	1	1.37726
2	3	28	66.9	43	23.9	5.1	1.1	4	5.12	24.3	5.6	1.618	0.118	0.017	118	4.21	0.349	83	28	338	12.6	44	284	9.1	15.5	156	1	4	1.38887
1	5	31	65.2	43.4	21.8	5.6	1.5	4.1	4.23	32.9	5.3	3.45	0.488	0.027	123	4.37	0.365	83.5	28.1	337	12.6	44.3	280	8.3	15.6	155	1	1	1.39506
1	5	30	69.5	44.7	24.8	5.3	1.3	4	4.08	26.9	8	3.408	0.432	0.04	124	4.61	0.374	81.1	26.9	332	13.1	46.7	336	8.3	15.4	164	1	3	1.41366
1	3	38	76	47.9	28.1	7.4	1.8	5.6	4.7	26	7.7	2.849	0.208	0.039	129	4.78	0.38	79.6	27	339	13	43.4	362	8.3	15.6	247	1	6	1.44813
1	12	32	75.2	44.3	30.9	11.7	2.3	9.4	4.11	45.7	5.8	1.821	0.29	0.035	135	4.56	0.389	85.2	29.6	347	12.6	41.9	251	8.3	15.6	251	1	5	1.45403
1	10	26	71.5	42.5	29	3.3	1	2.3	4.51	35.6	6.3	3.559	0.183	0.013	118	4.26	0.354	83.1	27.7	333	13.1	45.6	234	11.1	16	170	1	4	1.47118
2	10	25	67.2	45	22.2	7	1.9	5.1	4.77	36.1	9.7	7.721	0.194	0.029	125	4.41	0.378	85.7	28.3	331	13.4	46.9	371	8.2	15.6	112	1	5	1.47933
1	5		69.3	42.6	26.7	6.4			5.4	33	6.6	3.439	0.172	0.033	131	4.91	0.39	79.4	26.7	336	13.6	44.1	326	8.1	15.7	263	1	3	1.48989
2	3	28	71.6	45.4	26.2	6.1	1.5	4.6	4.85	23	6.7	2.58	0.308	0.027	114	4.14	0.336	81.1	27.5	340	13.5	42.9	275	7.4	15.2	159	1	5	1.49956
1	10	35	72.1	47.6	24.5	21.2			4.8	43	4.7	2.834	0.197	0.014	132	4.56	0.399	87.4	28.9	331	12.7	46.6	255	10.1	15.7	105	1	5	1.5125
1	2	33	67.3	44.7	22.6	3.8	1.1	2.7	2.79	23.8	7.4	2.834	0.252	0.022	118	4.22	0.352	83.5	28	335	13.1	44.3	402	7.7	15.1	170	1	2	1.51898
1	2	43	72.6	46.3	26.3	3.7	1	2.7	3.77	32.3	13.2	7.379	0.422	0.026	123	4.77	0.365	76.5	25.8	337	13.6	43.5	351	7.3	15.4	180	1	2	1.53517
2	2	65	76.2	43	33.2	14.9			3.3	16	8.4	3.805	0.454	0.034	124	4.95	0.375	75.8	25.1	330	14.5	47	297	8.7	15.6	205	1	2	1.55928
2	12	18	68.6	42.7	25.9	6.5	2.1	4.4	2.35	36.1	5	2.785	0.17	0.02	131	4.71	0.395	83.8	27.8	332	12.9	45.4	243	9.4	16.1	184	1	1	1.57139
1	5	28	74.7	44.4	30.3	6	1.1	4.9	3.71	30.2	9.2	4.158	0.212	0.028	123	4.81	0.368	76.5	25.6	334	13.1	44.2	253	10.5	15.9	336	1	6	1.59522
1	13	41	78.3	50.3	28	7.1	1.3	5.8	4.68	56.4	5.7	3.317	0.239	0.023	152	5.53	0.462	83.6	27.5	329	13.6	47.6	234	10.2	16	210	1	3	1.59686
1	9	30	69.5	45.5	24	4.7	1.3	3.4	4.96	32.5	4.9	2.328	0.162	0.015	132	4.94	0.397	80.3	26.7	333	13.3	44.6	282	8.5	15.3	200	1	1	1.60327
2	2	36	65.2	42.3	22.9	6	1.4	4.6	2.89	24.5	8	2.656	0.288	0.04	117	4.75	0.355	74.7	24.6	330	14.6	46.5	351	9	15.3	115	0	5	1.60918
1	2	51	67.6	41.1	26.5	4.1			2.4	23	7.3	2.175	0.285	0.022	133	4.96	0.401	80.9	26.8	331	13.9	45.7	374	8.5	15.6	153	1	5	1.61201
1	7	27	69.7	41.6	28.1	11.9	2.7	9.2	4.07	38.9	5.6	2.968	0.168	0.017	121	4.65	0.365	78.5	26	331	13.8	45.6	402	7.7	15.5	190	1	6	1.62307
1	2	32	61	41.5	19.5	3.3	0.9	2.4	3.91	23	6.8	4.264	0.673	0.027	110	4.12	0.335	81.3	26.7	328	14.6	48.2	255	8	15.4	115	1	2	1.64735
1	1	48	65.2	43.7	21.5	6.4	1.4	5	4.14	16.1	13.5	3.226	0.432	0.095	115	5.04	0.351	69.7	22.8	327	16.6	49.4	464	7.8	15.3	105	1	5	1.67024
1	5	38	72.6	47.4	25.2	5.5	1.6	3.9	3.88	30.7	11.2	9.845	0.526	0.034	127	4.58	0.387	84.5	27.7	328	13.6	47.8	288	8.6	15.6	110	1	1	1.67867
2	3	38	73.5	47.8	25.7	8.6			3.8	29	17.8	13.332	0.552	0.018	132	4.7	0.4	85.2	28.1	330	13.2	45.8	344	7.4	15.4	160	1	3	1.67905
1	8	26	70.8	43	27.8	2.1	0.6	1.5	4.58	27.9	12.2	8.918	0.256	0.012	123	4.4	0.37	84.2	28	332	12.6	44.4	357	8.6	15.8	143	1	3	1.69272
2	3	101	61.3	40.9	20.4	2.7	1.3	1.4			7.6	3.838	0.281	0.03	119	4.47	0.361	80.7	26.6	330	13.5	45.6	357	8.4	15.5	126	1	3	1.69901
1	13	25	78	46	32	10.2			4.15	56	6.2	3.404	0.409	0.012	141	4.64	0.41	88.3	30.4	344	11.9	41.3	249	8.6	16.1	125	1	4	1.7127
1	5	27	65.9	43.7	22.2	6.7	1.5	5.2	3.94	29.7	8.2	3.305	0.394	0.041	131	4.63	0.391	84.5	28.3	335	11.7	43	328	8.3	15.4	495	0	5	1.71867
1	13	21	71	44.4	26.6	12.3	3.1	9.2	4.91	47.6	5.5	2.118	0.242	0.022	129	4.46	0.386	86.5	28.9	334	12.8	43.1	209	10.1	16.1	236	1	3	1.75236
1	12	26	63.4	39.2	24.2	7.2	1.9	5.3	4.65	36	4.7	2.599	0.122	0.009	109	3.74	0.333	89.1	29.1	327	13.2	47.9	245	9.6	16	358	0	3	1.77153
1	4	23	72.3	46.1	26.2	7.4	2	5.4	5.25	23.2	7.9	3.982	0.569	0.024	123	4.77	0.367	76.9	25.8	335	15.5	42.6	314	9.5	10	123	0	6	1.78011
1	9	26	66	43.2	22.8	7	1.8	5.2	4.97	34.2	5.1	2.096	0.133	0.01	127	4.71	0.378	80.2	27	336	12.6	42.3	283	7.7	15.5	224	1	1	1.78576
1	9	28	67.5	44.7	22.8	5.1	1.3	3.8	4.84	27.7	5.6	2.492	0.112	0.006	135	5.06	0.4	79.1	26.7	337	12.7	42	335	6.9	15.3	191	1	1	1.79786
1	5	24	70.2	44.1	26.1	6.8	1.8	5	3.38	24.8	7.5	2.137	0.33	0.023	117	3.85	0.351	91.2	30.4	333	12.8	43.1	286	7.2	15.5	117	1	5	1.8014
2	10	34	73.9	45.5	28.4	5.9	1.4	4.5	4.33	31.3	5.2	2.517	0.374	0.01	121	4.3	0.37	86	28.1	327	13.5	47.3	241	10.4	16	106	0	1	1.81205
1	5		67.3	41.1	26.2	8.8			4.1	32	4.8	2.395	0.211	0.014	127	4.54	0.387	85.2	28	328	13.3	45.9	313	8.6	15.8	140	1	1	1.82742
1	10	33	71.6	45.1	26.5	13	2.9	10.1	3.08	33.5	9.8	6.331	0.274	0.039	141	5.13	0.422	82.3	27.5	334	11.9	42.5	291	8.5	15.6	173	0	5	1.83807
1	8	39	67.4	42.1	25.3	5.4	1.4	4	3.19	33	4.9	1.558	0.142	0.01	145	5.26	0.428	81.4	27.6	339	11.7	41.3	269	9.1	16.1	144	1	4	1.8611
1	6	28	70	44.1	25.9	6.3	1.7	4.6	3.54	33.9	6.8	3.312	0.265	0.02	127	4.38	0.368	84.1	29	345	12.2	40.6	251	8.9	16.2	349	1	1	1.86587
2	1	56	63.8	39.4	24.4	1.4	0.1	1.3	3.94	17.6	13.9	5.199	0.876	0.083	94	4.12	0.287	69.7	22.8	327	17	46.4	601	7.7	14.9	348	1	5	1.87283
1	9		73.4	41.9	31.5	10.5			4	36	4.2	2.1	0.202	0.013	132	4.87	0.398	81.7	27.1	332	12.9	42.8	350	8	15.4	174	1	1	1.88685
1	9	31	72.4	43.8	28.6	5.8	1.4	4.4	4.16	40	7.9	4.669	0.387	0.016	121	4.66	0.372	79.8	26	325	14.9	49.7	232	8.9	15.8	210	1	5	1.8901
2	12	25	69.7	41.1	28.6	9	2.2	6.8	2.51	42.8	6.4	3.622	0.237	0.019	132	4.8	0.407	84.7	27.5	325	14	49.7	244	9.7	15.8	180	1	1	1.8901
1	3	37	63.8	41.4	22.4	5	0.8	4.2	6.02	28.8	11	5.544	0.539	0.044	127	4.44	0.39	87.9	28.6	325	13.7	49.1	446	8.6	15.6	162	1	1	1.91771
1	1	28	59.3	37.2	22.1	2.6	0.8	1.8	2.15	20.8	16.8	8.568	2.016	0	111	4.95	0.342	69	22.4	325	16.6	48.8	608	7.5	15.2	133	1	5	1.93151
2	11	34	77.4	48.3	29.1	7.6	1.7	5.9	4.78	38.2	10.1	6.474	0.596	0.03	133	4.62	0.399	86.4	28.8	333	12.5	42.1	345	8.3	15.7	163	1	1	1.93349
1	2	33	64.8	43.1	21.7	2.9	1.1	1.8	3.63	22.2	6.3	2.457	0.384	0.025	114	4.27	0.345	80.7	26.7	331	13.3	42.6	273	8.6	15.5	148	1	2	1.95478
1	7	25	72.1	44.2	27.9	8.5	2	6.5	3.37	33.4	10.7	6.313	0.342	0.064	123	4.61	0.37	80.2	26.7	333	13.4	41.9	319	9.8	15.5	113	1	6	1.95991
2	8	28	73	43.5	29.5	16.9			4.63	37	4.6	2.383	0.212	0.032	93	5.41	0.296	54.7	17.2	314	17	32.5	451			176	1	6	1.96636
1	6	42	83	51.9	31.1	3.6	0.8	2.8	4.11	26.8	9.1	5.242	0.428	0.027	133	5.06	0.407	80.4	26.3	327	13.3	44.8	327	8.7	15.5	240	1	2	1.98088
2	3	37	75.1	46.2	28.9	4	0.6	3.4	5.15	41.1	14.7	8.188	0.603	0.044	131	4.51	0.397	88.1	29	330	12.4	42.7	308	8.5	16.1	154	1	5	1.98846
1	1	41	73.1	43.9	29.2	4.3	0.5	3.8	2.47	17.9	9	2.943	0.387	0.027	117	4.13	0.348	84.2	28.3	336	13.1	41	360	8.8	15.8	158	1	2	1.99944
1	2	41	72.5	49.2	23.3	4.4	1.3	3.1	3.36	20.9	10	3.08	0.2	0.04	130	4.95	0.397	80.2	26.3	327	13.2	44.5	314	7.4	15.5	380	1	1	2.00114
2	1	57	75.6	48	27.6	6.2	1	5.2	4	16.8	14.5	5.51	0.58	0.073	123	4.92	0.374	76	25	329	14.2	42.9	287	8.2	15.4	222	1	2	2.0154
1	11	30	70.2	43.6	26.6	5.4	1	4.4	4.92	32.8	5.9	3.039	0.136	0.024	132	4.58	0.387	84.6	28.8	341	12.2	40.3	303	8.3	15.7	161	1	5	2.01991
1	8	30	70.4	43.2	27.2	7.9	1.5	6.4	4.05	27.6	6.5	3.679	0.169	0.033	118	4.23	0.345	81.5	27.9	342	12.6	40.2	239	7.6	15.5	251	1	4	2.02388
2	2	48	68.9	44.5	24.4	6.9	1.6	5.3	5.83	23.8	6.3	2.117	0.145	0.025	124	4.16	0.377	90.6	29.8	329	12.7	42.8	361	9.1	15.7	144	1	5	2.0243
1	10	30	78.2	47.7	30.5	15.5	3	12.5	6.24	39.7	8.9	5.207	0.249	0.018	141	4.7	0.399	84.8	30	354	12	39.6	339	7.3	15.7	106	1	6	2.02461
2	2	36	70.9	44.4	26.5	7	1.4	5.6	3.21	21.1	10.7	6.666	0.749	0.043	117	4.53	0.352	77.6	25.8	333	13.7	41.4	304	8.9	15.5	185	1	2	2.02595
1	3	35	65.9	43.3	22.6	3.7	1.3	2.4	4.52	27.2	7.2	2.189	0.274	0.05	116	4.23	0.357	84.5	27.4	325	13.5	46.6	427	7.7	15.4	403	1	5	2.03273
2	7	25	82.3	48.4	33.9	10.6	2.8	7.8	5.1	27.8	11.3	7.481	0.339	0.034	101	5.91	0.335	56.7	17.1	301	16.1	36.8	581	8.7	15.1	390	1	6	2.03382
2	12	21	71	42.2	28.8	8.3	2.2	6.1	2.01	41.3	5.2	2.616	0.286	0.016	128	4.67	0.395	84.6	27.4	324	13.7	48.7	260	8.6	15.9	185	1	1	2.04542
1	10	28	72.8	46.4	26.4	11.1	2.4	8.7	5.98	41.4	9.5	4.408	0.228	0.019	139	4.52	0.411	91	30.8	338	12.1	40.4	339	7.7	15.6	122	1	6	2.05807
1	1	33	67.5	45.6	21.9	5	1	4	5.39	23.7	14.1	6.444	0.832	0.056	121	4.56	0.367	80.4	26.5	330	13.2	42	337	8.1	15.4	133	1	3	2.05833
2	5	36	71.4	41.3	30.1	12.7			4	32	5.5	2.294	0.209	0.017	125	4.21	0.365	86.7	29.7	342	11.7	39.9	316	7.6	15.5	178	1	1	2.09256
1	7	34	75.8	45.4	30.4	13.7	3	10.7	6.39	30.3	7	4.207	0.357	0.021	141	5.4	0.422	78.2	26.1	334	13.1	40.7	220	11.2	15.6	226	1	5	2.0952
2	7	29	72.5	44.5	28	5.7	1.3	4.4	3.82	28.4	9.4	4.108	0.273	0.009	121	4.19	0.357	85.3	28.9	339	11.9	40.1	342	7.8	15.6	101	1	5	2.09708
1	6	29	64.4	42.5	21.9	3.6	0.9	2.7	4.21	36.7	5.4	2.587	0.135	0.027	126	4.86	0.387	79.7	25.9	325	13.9	45	457	7.6	15.4	150	1	1	2.10635
2	8	22	75.1	46.3	28.8	20.2	5.6	14.6	3.45	31.9	6.2	3.088	0.143	0.037	102	5.75	0.321	55.9	17.7	317	14.6	31.6	367	9.6	14.9	125	1	6	2.12533
1	6		66.9	41.7	21.2	7.5			4.1	31	6.7	3.43	0.168	0.027	119	4.6	0.365	79.3	25.9	326	13.1	43.4	368	8	15.5	250	1	2	2.12769
1	3	37	69.2	42.4	26.8	5.9			3.53	31	9.3	5.022	0.66	0.019	120	4.45	0.361	81.1	27	332	14.1	40.8	320	9.4	10.4	118	1	5	2.12951
2	3	38	68.1	44.6	23.5	7.7	1.3	6.4	3.22	21.4	6.3	3.011	0.176	0.025	109	4.03	0.331	82.1	27	329	13	41.6	290	7.9	15.2	125	1	4	2.13116
1	7	21	71	42.8	28.2	9.2	2.4	6.8	3.48	37	8	5.08	0.408	0.024	127	4.76	0.392	82.4	26.7	324	13.8	45.9	532	7.5	15.3	161	1	6	2.14411
1	5	36	66.6	46.6	20	7.5	1.8	5.7	4.61	27.5	5.9	2.997	0.13	0.012	130	4.78	0.401	83.9	27.2	324	13	45.8	276	8.1	15.8	101	1	5	2.14764
2	2	34	76.8	48.3	28.5	6	1	5	4.08	26.3	8.7	5.812	0.252	0.017	131	4.54	0.394	86.7	28.9	333	12.6	40.4	385	8.2	15.7	171	1	2	2.15804
1	6	43	71.2	46.6	24.6	11.7	2.6	9.1	6.86	30.4	9	5.895	0.45	0.027	110	5.71	0.36	63	19.3	306	17.3	37	254			137	1	5	2.15922
2	3	43	78.9	48.6	30.3	7.3	1.5	5.8	4.62	21.3	16.6	7.138	0.415	0.033	132	5.18	0.406	78.4	25.5	325	14.4	43.8	358	9.4	15.6	190	1	5	2.16156
1	4		70.4	42	27.6	13.4			5.82	32	5.8	2.494	0.215	0.023	93	4.97	0.282	56.7	18.7	330	16.9	40.9	400	8.6	15.4	211	1	6	2.16812
2	4	33	69.9	43.8	26.1	4.7	1	3.7	4.15	28.7	8.8	4.259	0.22	0.035	115	4.17	0.344	82.6	27.6	334	12.3	40	301	8.2	15.6	314	0	5	2.19519
1	10	23	71.3	44.8	26.5	9.2	1.9	7.3	4.34	46.1	7.6	2.888	0.289	0.068	132	4.81	0.403	83.8	27.4	328	13.6	41.2	425	9.6	10	189	1	1	2.19538
1	6	26	69.4	42.8	26.6	3.4	0.8	2.6	3.7	28.6	5.8	2.268	0.168	0.017	124	4.29	0.361	84.2	28.9	343	11.8	39.4	186	9.1	16.4	215	1	1	2.19779
2	9	27	71.3	43.3	28	2.8	0.7	2.1	2.58	34.1	7.3	3.927	0.299	0.037	111	5.24	0.353	67.3	21.2	315	13.4	35.3	309	9.1	15.5	230	1	6	2.20383
2	3	28	65.2	42.9	22.3	6.5	1.2	5.3	4.09	35.9	8.3	3.594	0.357	0.025	117	4.32	0.331	76.7	27.1	353	12.8	39.1	292	7.7	15.3	186	1	3	2.20964
1	2	30	67.3	43.2	24.1	4.7	1	3.7	4.09	26.4	7.4	3.493	0.289	0.022	118	4.26	0.357	83.8	27.7	331	13.7	40.2	354	9.5	9.5	143	1	5	2.22015
1	9	25	73.7	44.8	28.9	8.5	2.5	6	3.73	31.4	5.8	3.138	0.157	0.006	115	4.42	0.358	80.9	26	322	15.2	51.7	226	9	15.8	310	1	5	2.22283
1	7	42	65.8	41.9	23.9	6.1	1.1	5	6.12	43.5	9.7	5.335	0.369	0.029	125	4.64	0.374	80.7	26.9	334	12.4	39.7	260	9.2	15.6	200	1	2	2.23805
1	10	28	70.8	43.4	27.4	3.5	0.8	2.7	5.15	30.9	7.7	3.896	0.362	0.023	122	4.22	0.368	87.3	28.9	331	11.7	39.9	306	7.9	15.3	222	1	3	2.25332
2	7	28	71.1	43.1	28	11.6	2.7	8.9	5.3	25.9	8.6	2.821	0.198	0.052	122	4.77	0.377	79.1	25.6	323	12.9	44.5	287	8	15.4	252	0	4	2.25758
1	5	29	67.1	41.2	25.9	4.3	0.8	3.5	5.23	27.9	8.7	5.646	0.357	0.035	125	4.32	0.371	85.9	28.9	337	11.7	39.3	457	6.9	15.2	285	1	1	2.27071
2	4	39	70.2	42.8	27.4	4.1	0.8	3.3	4.59	23.8	9.5	5.149	0.39	0.01	114	4.13	0.349	84.5	27.6	327	13.6	40.5	314	9.5	10.2	233	1	5	2.27126
2	7	25	73.5	43.5	30	6.5	1.9	4.6	4.13	22.3	13.5	10.206	0.378	0.054	94	5.41	0.298	55	17.4	316	15.6	36	573	8.9	15.2	199	1	6	2.27429
1	5	35	76.1	41.7	34.4	11			3.23	35	9.6	5.088	0.413	0.038	127	4.41	0.373	84.5	28.8	341	11.8	39.1	383	8	15.4	215	0	4	2.28171
2	5	23	73.7	47.3	26.4	11.1	2.6	8.5	5.59	31.8	5.9	3.8	0.319	0.018	127	4.47	0.382	85.5	28.4	332	13	39.5	294	10.2	10.9	143	1	5	2.28724
1	1	52	65.6	41.9	23.7	5.3	1.3	4	3.74	20.8	7.8	1.537	0.343	0.039	117	4.64	0.363	78.2	25.2	322	16.7	46.5	349	9.6	9.8	109	1	2	2.29422
2	1	37	69.6	48.3	21.3	4.3	0.9	3.4	5.6	20.4	10.2	4.315	0.5	0.02	123	4.87	0.382	78.4	25.3	322	14.4	45.9	337	8.9	16	224	1	5	2.30246
1	6	39	72.6	43.7	28.9	5.9	1.1	4.8	4.03	32.8	6.6	2.64	0.304	0.033	126	4.81	0.388	80.6	26.2	325	12.7	40.6	307	8	15.7	142	1	6	2.30879
1	4	25	68.7	43.5	25.2	3.9	0.9	3	4.02	19.7	7.8	2.894	0.242	0.023	128	4.64	0.393	84.7	27.6	326	12.8	39.9	400	7.2	15.3	463	1	3	2.32639
1	3	50	73.9	48.1	25.8	6.6	1.4	5.2	3.01	30.8	8.8	4.25	0.475	0.018	122	4.61	0.371	80.5	26.5	329	13.9	39.4	318	11.4	12.6	153	1	5	2.32707
1	3	28	74.7	47.7	27	5.4	1.2	4.2	3.13	29.6	8.4	5.082	0.622	0.034	119	4.39	0.351	80	27.1	339	12.4	38.9	249	7.9	15.5	324	1	1	2.33306
2	7	44	74.5	42.8	31.7	17.6			3.4	28	7.2	2.693	0.209	0.014	127	4.31	0.367	85.2	29.5	346	11.5	38.8	284	8.2	15.9	135	1	5	2.33327
1	2	46	75.7	47.2	28.5	6.7	1.4	5.3	3.97	23.7	11.4	3.773	0.661	0.023	120	4.46	0.37	83	26.9	324	13.9	40.5	405	9.7	10.2	147	1	1	2.33446
1	1	29	62.2	43.6	18.6	5.3	1.1	4.2	4.96	20.1	12.6	3.427	0.391	0.038	116	4.27	0.359	84	27.2	323	13.3	41.3	371	7.2	15.3	153	1	3	2.33594
1	5	26	70.3	44.5	25.8	5	1.2	3.8	5.4	26.9	10.4	5.47	0.572	0.031	114	4.41	0.36	81.6	25.9	317	12.9	37.3	340	10	10.8	125	1	3	2.35373
2	3	32	77	47.2	29.8	4.9	0.9	4	3.54	22.2	9.9	5.821	0.347	0.02	129	4.47	0.381	85.3	28.9	338	12.3	38.8	624	7.2	15.3	167	1	2	2.3555
2	2	29	69.9	43.3	26.6	5.6	1.5	4.1	3.18	25.3	9.2	6.173	0.69	0.009	118	4.64	0.364	78.4	25.4	324	14.4	39.9	164	11.9	13.9	191	1	2	2.35562
2	11	28	76.8	46.5	30.3	7.3			3.5	44	9	5.769	0.459	0.018	135	4.6	0.417	90.7	29.3	324	11.9	39.9	366	7.8	15.5	114	0	5	2.35562
1	11	34	71.2	44.9	26.3	6.7			5	42	5.5	2.668	0.176	0.028	136	4.63	0.408	88.1	29.4	333	12	38.9	330	7.8	15.6	189	1	5	2.35618
2	2	45	70.3	46.1	24.2	4.8	1	3.8	5.5	26.4	7	2.933	0.203	0.028	128	4.48	0.393	87.8	28.6	325	12.2	39.5	399	8.2	15.4	121	1	2	2.35941
1	2	27	66.3	42.4	23.9	11.9	3.4	8.5	3.59	22.1	7.1	2.499	0.39	0.007	126	4.66	0.387	83	27	326	13.2	39.3	310	9.6	9.6	179	1	6	2.36045
1	2	37	70.5	45.5	25	7.7	1.3	6.4	3.65	21.5	12.1	3.63	0.581	0.024	124	4.64	0.382	82.3	26.7	325	13.5	39.4	403	9.8	9.7	196	1	1	2.36401
1	5	27	68.2	40.5	27.7	14.3			5.92	40	6.4	3.181	0.333	0.032	87	4.74	0.272	57.4	18.4	320	17.2	33.8	395			205	0	6	2.36655
1	6	39	72.7	44.1	28.6	7.8			7.36	34	4.4	1.976	0.119	0.018	128	4.57	0.374	81.8	28	342	12.1	38.7	346	7.9	15.6	167	1	5	2.36728
1	2	31	65	44.7	20.3	8.1	2	6.1	6.55	27.9	12	4.056	0.648	0.036	116	4.41	0.366	83	26.3	317	12.9	37.7	314	10	10.1	223	1	3	2.36976
1	9	22	71.6	43.4	28.2	6.9	1.7	5.2	4.09	35.3	5.9	3.139	0.242	0.006	115	4.21	0.358	85.1	27.3	321	14.4	49.8	266	8.6	15.6	323	1	6	2.37005
2	3	66	67.3	47.4	19.9	6.9	1.1	5.8	5.3	25.2	7	2.436	0.133	0.021	120	4.21	0.365	86.7	28.5	329	12.1	38.9	375	7.2	15.6	214	1	3	2.37159
2	9	52	67.9	47.6	20.3	4.3	0.9	3.4	4.31	17.6	13.4	3.002	0.295	0.027	123	4.82	0.378	78.4	25.5	325	12.8	39.2	390	8.1	15.3	236	0	1	2.37321
1	6	28	71.7	44.1	27.6	5.5			3.72	32	11.5	8.556	0.609	0.046	125	4.86	0.386	79.4	25.7	324	14	39.4	502	9.6	10.2	135	1	5	2.37324
2	6	22	70.2	46	24.2	6.3	1.6	4.7	4.35	28.6	6.5	2.873	0.195	0.026	118	4.4	0.367	83.5	26.8	321	14.4	48.7	283	9.8	16	199	1	3	2.37332
1	2	30	69.3	44.5	24.8	4.3	1	3.3	3.12	21.6	11.1	2.953	0.4	0.033	122	4.53	0.372	82.1	26.9	328	13.4	38.9	460	10.6	11.7	339	1	1	2.37545
1	3	31	63.2	41.4	21.8	5.9	1.4	4.5	6.14	27	13.6	7.235	0.558	0.054	138	5.05	0.429	85	27.3	321	13.3	47.2	524	9.1	15.6	250	1	1	2.37778
1	1	45	73	46.6	26.4	2.8	0.6	2.2	2.16	21.3	14.6	4.833	0.38	0.029	122	4.4	0.379	86.2	27.7	322	12.6	40.3	557	8.2	15.8	135	1	3	2.37935
2	2	32	71.4	45.6	25.8	6	1.6	4.4	3.99	20.6	10	4.83	0.4	0.01	123	4.88	0.382	78.3	25.2	322	14.5	40	213	12.5	14.9	180	1	2	2.38347
1	7	27	74.6	45.9	28.7	4.6	1.2	3.4	5.68	32.8	4.9	2.974	0.181	0.01	117	4.19	0.354	84.5	27.9	331	12.9	38.7	365	9.6	10.3	260	1	1	2.386
1	2	40	67.9	43.9	24	9.1	1.8	7.3	3.89	26.6	12	5.592	0.636	0.036	128	4.93	0.396	80.3	26	323	13.7	39.2	338	9.6	9.6	153	1	2	2.38737
2	1	41	63.2	42.9	20.3	4.8	0.9	3.9	4.88	34.4	6.9	1.546	0.38	0.007	116	4.42	0.353	79.9	26.2	329	13.6	38.7	300	9.4	9.6	104	0	1	2.3894
2	3	26	66.4	42.6	23.8	5	1.3	3.7	4.49	27.9	6.5	3.211	0.331	0.02	117	4.18	0.36	86.1	28	325	12.6	38.8	343	10.7	11.1	103	1	6	2.39161
1	3	28	67.1	43.4	23.7	3.7	0.8	2.9	3.42	25.5	7.2	5.069	0.792	0.014	118	4.39	0.356	81	26.9	332	12.2	38.6	279	7.7	15.5	461	1	3	2.39643
1	10	34	79.4	48.8	30.6	7.9	2.2	5.7	5.65	41.9	11.4	7.638	0.376	0.034	148	5.55	0.462	83.2	26.7	320	12.9	38.8	245	11.6	12.7	153	1	6	2.4055
1	2	50	66.8	45.3	21.5	7.9	2.3	5.6	1.73	27	5.9	2.035	0.372	0.041	127	4.66	0.387	83	27.3	328	12.6	38.5	285	8.6	15.8	133	1	2	2.40677
1	13	18	71.8	46.5	25.3	5.4	1.8	3.6	4.45	46.1	4.7	2.519	0.282	0.009	144	5.29	0.446	84.3	27.2	323	12.7	38.4	241	9.9	10.8	125	1	5	2.40696
1	13	15	68.7	43.5	25.2	9.6	2.8	6.8	4.17	44.9	5	2.955	0.18	0.02	139	5.15	0.429	83.3	27	324	12.9	38.4	253	9.6	10.1	105	0	1	2.40849
2	8	30	71.9	44	27.9	8.7	2.1	6.6	5.15	25.7	7.3	1.993	0.277	0.058	123	4.76	0.369	77.5	25.8	333	13.8	38.5	330	9.2	9.6	168	0	4	2.40901
1	2	30	73.3	47.3	26	5.1	1.5	3.6	5.11	24.6	8.2	2.509	0.369	0.008	130	5.07	0.401	79.1	25.7	326	13.7	38.4	231	9.3	15.7	138	1	2	2.41154
2	2	47	69.9	45.9	24	10.6	1.3	9.3	4.47	23.1	8	3.128	0.288	0.016	125	4.39	0.363	82.8	28.5	344	11.9	38.5	357	6.2	15.1	152	1	2	2.41396
1	4	25	69.1	46.9	22.2	5.1	1.1	4	5.15	32.3	7.4	3.974	0.34	0.03	129	4.63	0.396	85.5	27.9	326	12.1	38.3	441	7.6	15.4	347	1	1	2.41722
1	12	32	71.1	45.6	25.5	10.5	2.6	7.9	4.13	40.5	7.2	4.255	0.18	0.022	124	4.13	0.375	90.9	30	330	11.4	38.4	239	8.8	16	186	0	4	2.41765
1	5		73.8	43	30.8	11.1			4.5	26	7.6	4.438	0.342	0.023	93	5.09	0.29	57	18.3	321	17.1	33.4	543	10.5	12.3	212	1	6	2.41876
1	7	24	70.8	42.7	28.1	7.1	2.1	5	4.29	34.9	8.3	4.723	0.382	0.033	121	4.55	0.375	82.4	26.6	323	12.9	37.9	289	11.8	13.5	120	1	6	2.41921
1	1	43	64.1	42.1	22	3.2	0.9	2.3	3.68	22.2	12.8	6.118	0.653	0.026	113	4.16	0.354	85	27.2	320	12.9	40.7	315	7	15.4	175	1	3	2.4203
2	1	38	68.1	43.8	24.3	7.7	1.4	6.3	4.54	31.9	6.4	1.619	0.416	0.013	125	4.89	0.383	78.3	25.6	326	13.8	38.2	281	8.7	8.7	169	1	5	2.4229
1	6	27	71	43.9	27.1	7.5	1	6.5	5.87	36.5	7.7	4.612	0.208	0.023	120	4.48	0.373	83.3	26.8	322	12.3	36.8	325	10.9	12.1	245	1	3	2.42741
1	5	29	67.8	45.4	22.4	11	2.8	8.2	5.01	31.1	7.4	4.751	0.303	0.022	118	4.67	0.365	78.2	25.3	323	13.4	37.5	265	10.2	10.4	114	1	3	2.42901
1	8	28	77	44.3	32.7	4.7	1.2	3.5	5.27	35.2	4.7	2.143	0.24	0.028	132	5	0.386	77.2	26.4	342	14	38.4	421	9	9.2	245	1	1	2.43596
1	4	49	74.1	46	28.1	15.6	2.8	12.8	5.74	26.8	5.5	2.745	0.143	0.022	90	4.84	0.279	57.7	18.6	322	15.8	36	480	7.8	15.4	133	1	6	2.43839
2	7	31	76.5	42.9	33.6	10.4			4.68	36	7.7	2.564	0.216	0.054	130	4.96	0.388	78.2	26.2	335	12.5	38.3	332	7.8	15.2	101	1	4	2.44064
2	3	24	67.3	43.1	24.2	3.3	0.9	2.4	4.51	30.7	12.1	6.691	0.46	0.024	115	4.47	0.357	79.9	25.7	322	12.6	35.5	330	9.4	9.7	133	1	3	2.44525
1	8	38	71.4	42.7	28.7	4.9			4.37	38	9	6.057	0.279	0.018	131	4.52	0.399	88.3	29	328	11.9	38	336	10.1	10.9	132	1	3	2.44591
2	7		70.1	40.8	29.3	16.6			2.76	35	4.9	2.318	0.132	0.034	93	5.25	0.286	54.5	17.7	325	16.2	37.6	401	8.6	15	230	1	6	2.44682
1	4	45	72	45.7	26.3	15.2	3.2	12	5.2	30.3	5.5	2.503	0.231	0.022	94	4.97	0.292	58.7	18.9	322	15.1	34.7	333	9	15	294	1	6	2.45624
1	4	29	73.7	44.4	29.3	9.3	2.5	6.8	4.75	27.5	6.4	3.066	0.173	0.032	88	4.75	0.277	58.4	18.5	317	16.3	39.9	480	8.8	15.5	333	1	6	2.45791
2	1	46	69.7	46.3	23.4	7	1	6	4.36	24.4	9.4	4.145	0.235	0.028	140	5.31	0.405	76.2	26.4	346	12.7	38.3	349	7.7	15.4	172	1	3	2.46926
1	12	32	80.7	49.6	31.1	4.6	1.5	3.1	3.98	44.9	8.5	4.191	0.213	0.043	143	5.17	0.447	86.4	27.7	320	13.7	48	457	8.2	15.7	175	0	5	2.47717
2	4	48	74.3	41.6	32.7	8.9			4.16	31	8.4	3.242	0.361	0.008	111	4.14	0.34	82.1	26.8	326	12.8	37.1	345	9.7	10.3	128	1	5	2.48534
2	1	38	66.9	43.5	23.4	3.8	0.7	3.1	3.13	15.8	12.4	3.819	0.694	0.05	131	5.2	0.41	78.8	25.2	320	16	49.2	336	7.4	15.1	150	1	2	2.48652
2	10	55	72.2	41.2	31	8			2.2	16	12.7	5.817	0.965	0.114	119	4.99	0.366	73.3	23.8	325	12.7	36.7	401	7.8	15.6	218	1	3	2.48823
2	1	44	74.1	50.2	23.9	4.4	1.1	3.3	4.36	22.5	10.3	2.853	0.381	0.031	125	4.84	0.391	80.7	25.8	320	15.1	49.5	191	9	15.6	318	1	5	2.48886
1	2	31	71.1	45.9	25.2	4.5	0.4	4.1	4.18	20	14.7	7.438	0.323	0.029	124	4.13	0.365	88.4	30	340	11.6	38.1	413	7.5	15.3	285	1	6	2.49513
1	1	35	67.7	45.8	21.9	6.3	1.4	4.9	5.04	28.2	12.2	3.989	0.415	0.024	125	4.87	0.395	81.1	25.7	316	13.5	40.4	513	7.9	15.4	229	1	2	2.49794
1	7	24	70	43.3	26.7	7.5	1.9	5.6	2.57	29.6	9	5.058	0.288	0.009	122	4.65	0.364	78.2	26.2	336	12.4	37.9	336	8.9	15.6	136	1	6	2.50899
1	4	35	76.3	45.4	30.9	7.1	1.7	5.4	3.38	27.7	12	6.42	0.456	0.024	124	4.63	0.371	80.1	26.8	334	13.4	37.8	456	9.2	9	134	1	5	2.50946
1	2	34	65.2	42.7	22.5	3.7	0.7	3	2.47	28	6.2	2.474	0.366	0.019	109	4.26	0.326	76.5	25.6	334	12.6	37.8	230	6.7	15.2	153	0	2	2.50946
1	1		71.2	45.1	26.1	11.2			3.32	14	8.7	3.698	0.748	0.009	121	4.84	0.381	78.7	25	318	15	42.2	351	10.1	11	121	1	6	2.51071
1	3	31	69.1	45.1	24	4.7	0.9	3.8	4.86	36.2	11.3	5.108	0.237	0.023	117	4.27	0.347	81.3	27.4	337	11.9	37.9	456	6.7	15.2	387	1	3	2.51589
1	2		68.3	43.6	24.7	16			4.5	29	5.9	2.407	0.224	0.035	121	4.35	0.363	83.5	27.8	333	12.2	37.6	289	8.6	16	213	1	2	2.5279
1	2	31	69.5	43.8	25.7	8.2	2	6.2			10.4	5.668	0.728	0.021	126	4.72	0.387	82	26.7	326	12.3	36.2	338	8.9	8.3	120	1	6	2.53644
1	6	23	68.2	41.6	26.6	3.8	0.9	2.9	5.86	26.1	5.8	2.941	0.244	0.017	119	4.2	0.376	89.5	28.3	316	12.8	41.2	367	10	10	111	1	5	2.53861
1	3	32	68.7	48.3	20.4	12	2.8	9.2	4.78	27.9	7.4	3.582	0.303	0.022	126	4.59	0.375	81.7	27.5	336	12.4	37.7	280	9.1	15.6	162	1	1	2.54186
1	1	40	65.8	44.6	21.2	5.6	1.3	4.3	2.62	21.4	9.6	4.013	0.451	0.019	122	4.37	0.358	81.9	27.9	341	13	37.9	338	10.4	11.8	102	1	5	2.54352
1	8	35	68.9	42.3	26.6	3.7	0.8	2.9	6.1	36.9	7.3	4.124	0.19	0.022	124	4.34	0.376	86.6	28.6	330	11.5	37.1	365	7.8	15.4	190	1	5	2.5474
1	3	34	65.3	43	22.3	4.2	0.8	3.4	5.51	25.4	5.6	2.778	0.151	0.022	114	4.19	0.334	79.6	27.2	342	12.1	37.9	318	7.7	15.7	123	1	3	2.55042
2	1		74.7	47.5	27.2	4.7			3.3	26	12.9	3.651	0.516	0.052	126	4.71	0.38	80.7	26.8	331	11.8	37.1	447	7	15.1	221	1	1	2.56291
1	4	40	69	42.6	26.4	3.6	0.2	3.4	3.93	25.8	6.9	2.988	0.317	0.021	122	4.69	0.374	79.7	26	326	12.6	35.7	314	10.1	11	160	1	5	2.56482
1	7	25	71.5	43.5	28	6.9	1.9	5	3.92	35	9.1	4.878	0.364	0.027	123	4.65	0.375	80.6	26.5	328	12.8	36.3	306	11.8	13.4	175	1	6	2.579
1	3	37	72.6	47.7	24.9	12.5	2.5	10	4.38	27.3	7.3	2.08	0.168	0.037	130	4.8	0.39	81.3	27.1	333	12.4	37.2	312	9.5	15.7	275	1	1	2.58073
1	1	77	67.6	46.4	21.2	7.7	1.9	5.8	3.7	23.4	7.4	2.383	0.481	0.022	128	4.74	0.387	81.6	27	331	12.6	36.9	283	9.2	8.7	125	1	6	2.58503
2	3	25	66.3	40.6	25.7	7.1	1.4	5.7	5.18	27.7	9.4	4.747	0.385	0.019	123	4.61	0.373	80.9	26.7	330	12.9	36.7	320	9.3	9.6	185	1	3	2.58732
1	7		72.6	43.3	29.3	8.3			3.79	37	12.1	8.857	0.375	0.024	124	4.72	0.376	79.7	26.3	330	12.9	36.7	282	11.7	14.2	122	1	6	2.58732
1	4	34	72.5	46.1	26.4	3.4	0.8	2.6	3.99	29.1	9.9	4.584	0.396	0.01	116	4.3	0.355	82.6	27	327	12.1	35.8	367	9.4	9.5	136	1	3	2.58865
1	4	23	65.3	41.6	23.7	13.4	3.8	9.6	3.21	26.2	5.1	1.688	0.189	0.041	90	4.93	0.292	59.3	18.3	308	16.6	39.9	473	8.2	15.4	208	1	6	2.58944
2	6	26	75.5	47.3	28.2	11.1	2.9	8.2	5.67	29.6	6.9	3.146	0.262	0.021	132	4.61	0.395	85.7	28.6	334	12.3	37.2	383	10.2	10.9	121	1	5	2.59517
2	4	35	61.8	41.3	20.5	4	0.9	3.1	2.89	24.1	12.7	3.035	0.533	0.025	118	4.54	0.358	78.9	26	330	12.9	36.2	378	9.8	10.1	100	0	5	2.63723
2	9	22	74.1	44.7	29.4	11.7	2.8	8.9	3.81	41.6	7.2	3.838	0.259	0.007	130	4.8	0.394	82.1	27.1	330	12.3	36.2	315	9.8	10.1	183	1	1	2.63723
1	8	27	77.8	45.5	32.3	6.9	1.9	5	4.88	34.1	5.5	2.294	0.33	0.011	142	5.27	0.422	80	26.9	336	13.1	37.1	373	7.6	15.5	175	1	1	2.64048
1	2	37	69.9	45.5	24.4	7.8	1.6	6.2	1.95	24.6	7.7	2.426	0.223	0.031	127	4.77	0.37	77.6	26.6	343	12.4	37.5	395	7	15	107	1	5	2.65321
1	6	30	63.6	43.4	20.2	5.7	1.1	4.6	4.87	41.8	5.9	2.649	0.289	0.012	113	4.33	0.338	78.1	26.1	334	13.3	36.7	289	10.5	11.6	165	1	5	2.6666
1	2	37	62.4	41.7	20.7	3.4	0.9	2.5	4.1	17.3	6.1	2.684	0.22	0.031	119	4.54	0.374	82.3	26.2	318	14.3	47.8	468	7.2	15.2	386	1	3	2.67485
2	1	43	72.7	48.1	24.6	5.6	1.5	4.1	4.86	21.4	9.1	3.667	0.437	0.018	131	4.99	0.399	80	26.3	328	12.2	35	354	9.3	9.6	148	1	2	2.68078
1	11	44	63.4	38.8	24.6	4.7	1.2	3.5	1.81	17.3	9.6	3.514	0.499	0.019	110	4.47	0.349	78.1	24.6	315	15.9	43.2	417	9.4	10.3	291	1	2	2.69039
1	4	23	72.2	46.1	26.1	11.7	3.5	8.2	5.83	24.9	6.3	3.03	0.328	0.032	85	4.67	0.275	58.8	18.2	310	17.2	41.1	490	7.9	15.2	350	1	6	2.69868
2	2	31	66.5	41.3	25.2	5.7	1.1	4.6	3.03	22.4	8.3	3.411	0.39	0.025	126	4.35	0.359	82.6	29	351	11.6	37.5	400	6	15.2	166	1	2	2.74289
1	2	29	72.4	47.4	25	3.7	0.6	3.1	6	20.7	9.3	4.139	0.428	0.019	122	4.72	0.385	81.5	25.8	317	13.8	47.1	424	8.2	15.5	182	1	2	2.74642
2	7	21	73.8	46.8	27	11.9	3.3	8.6	4.82	29.9	8.7	5.472	0.244	0.009	101	5.67	0.311	54.8	17.8	325	14.2	30.7	546	8.6	15.5	427	1	6	2.76429
2	2		72.3	45.2	27.1	6.1			4.18	26	10	4.76	0.27	0.03	139	5.3	0.412	77.8	26.2	337	12	36.4	349	8	15.6	128	1	3	2.77859
1	1	79	64.9	41.9	23	2.1			1.9	24	8.7	2.601	0.391	0.044	120	4.68	0.381	81.5	25.6	315	14.9	45	339	7.9	15.2	197	1	2	2.80125
1	6	111	68.5	43.2	25.3	10.6			0.71	23	23.9	3.824	0.598	0.072	128	4.95	0.373	75.4	25.9	343	12.5	36.7	376	8.2	15.9	139	1	5	2.84496
1	4	37	62	41.1	20.9	3.6	1.3	2.3	3.28	30	4	1.652	0.272	0.016	111	4.11	0.35	85.1	27	317	14.3	49.6	178	9.4	15.7	258	1	3	2.84659
1	8	23	71.5	43	28.5	5	1.6	3.4	3.61	35	9.9	5.821	0.376	0.04	123	4.51	0.367	81.4	27.3	335	12.3	35.6	284	11.5	13.2	130	1	5	2.85538
2	4	33	59.6	41.3	18.3	2.6	0.9	1.7	2.3	19	15.5	5.007	0.543	0.062	112	4.26	0.331	77.7	26.3	338	11.9	36.1	415	7.4	15.5	102	0	2	2.8574
2	5	32	72.2	43.8	28.4	5.6			4.6	32	9.2	5.244	0.239	0.018	122	4.44	0.385	86.7	27.5	317	14.2	50.1	498	7.3	15.2	153	0	3	2.86663
2	1	52	74.4	48	26.4	7.9	1.4	6.5	2.7	17.1	9.7	3.327	0.417	0.058	97	4.49	0.313	69.6	21.6	310	15.8	42.9	337	7.5	15.4	166	1	2	2.90638
1	1	52	64.1	41.7	22.4	5.4	1	4.4	4.8	17.8	9	1.917	0.459	0.054	109	4.46	0.348	78	24.4	313	16.2	44.9	393	9.7	9.6	172	1	2	2.93192
2	2	29	62.6	39.5	23.1	6.5	1.1	5.4	5.74	29.3	11.5	6.946	0.334	0.023	115	4.38	0.33	75.3	26.3	349	12.4	36.8	374	6.8	15.2	115	1	3	2.93344
1	4	48	68.8	43.3	25.5	7			3.97	31	7.7	3.504	0.416	0.008	136	4.96	0.4	80.6	27.4	340	12.8	35.9	435	9.1	9	146	1	1	2.95143
1	8	32	70.3	42.6	27.7	5.8	1.6	4.2	4.9	39.2	6.7	3.337	0.302	0.02	127	4.75	0.377	79.4	26.7	337	12.5	35.4	308	11.8	14.9	153	1	5	2.95372
1	4	27	71.6	43.9	27.7	5.4	1.4	4	4.45	33.6	6.1	2.318	0.396	0.049	121	4.53	0.366	80.8	26.7	331	11.6	33.5	371	10.3	11.5	243	1	6	2.96097
1	1	37	70.8	46.6	24.2	3.1	0.6	2.5	5.31	19.6	13.3	3.791	0.599	0.027	132	5.18	0.395	76.3	25.5	334	12.7	34.4	382	11	11.5	160	1	2	2.99515
1	3	36	56.9	36.7	20.2	3.6	0.6	3	4.17	29.7	11.4	5.039	0.365	0.057	129	4.48	0.409	91.2	28.8	316	14.1	50.9	513	7.7	15.2	199	1	1	3.03166
1	6	51	71.6	47.8	23.8	7.3	0.9	6.4	5.76	28.1	5.5	2.932	0.154	0.017	127	4.69	0.405	86.4	27.1	313	13.2	46.4	280	9.9	15.9	106	1	3	3.05658
1	1	41	71.8	46.8	25	8.4	1.5	6.9	4.12	25.7	9.3	2.892	0.353	0.028	115	4.56	0.373	81.8	25.2	308	14.9	43.8	305	12.3	15.1	269	1	5	3.12339
2	12	20	65.2	40.3	24.9	10.2	3	7.2	2.19	41.7	5.7	3.289	0.217	0.011	124	4.5	0.394	87.5	27.6	315	14.3	50.6	295	9.2	15.9	155	1	1	3.14615
1	1	51	70.6	46.4	24.2	7.2	1.8	5.4	5.24	25.5	7.5	1.845	0.36	0.023	121	4.38	0.344	78.5	27.6	352	13	36.3	362	9.6	10	145	1	5	3.15793
1	7	25	74.9	46.5	28.4	10.5	2.5	8			5.6	3.646	0.19	0.011	129	5.09	0.385	75.6	25.3	335	12.4	33.5	245	10.6	11.4	120	1	6	3.17797
1	3	44	66.1	43.4	22.7	6.6	1.2	5.4	3.85	27.9	5.9	2.095	0.23	0.018	117	4.4	0.34	77.3	26.6	344	12.7	34.5	344	9	9.1	130	1	5	3.41577
1	2		75.2	47.9	27.3	6.8			3.4	27	6.9	3.35	0.47	0.01	121	4.32	0.36	83.8	28.1	335	13.1		300	7.6	15.8	224	1	6	8.3239
